# Supplementary material for: Ionic liquid microemulsions of 1-butyl-3-methylimidazolium hexafluorophosphate, N,N-dimethylformamide, and water
Source: Royal Society of Chemistry journal article supplement (doi:10.1039/c3ra43288b), 2013-01-01
Supplement: c3ra43288b.pdf [file c3ra43288b.pdf]

## Electronic supplementary information

# Ionic liquid microemulsions of 1-butyl-3-methylimidazolium hexafluorophosphate, *N,N*-dimethylformamide, and water

Jie Xu,<sup>a</sup> Lin Zhang,<sup>a</sup> Chunfang Li,<sup>a</sup> Tianrong Zhan,<sup>a</sup> Wanguo Hou <sup>\*b</sup>

<sup>a</sup> State Key Laboratory Base of Eco-chemical Engineering, Qingdao University of Science and Technology, Qingdao 266042, P.R. China;

<sup>b</sup> Key Laboratory of Colloid and Interface Chemistry (Ministry of Education), Shandong University, Jinan 250100, P.R. China

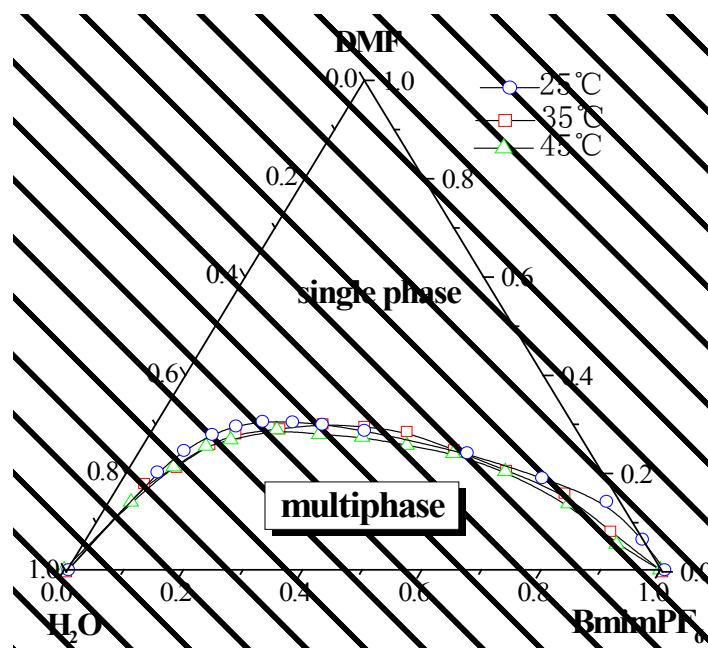

Fig. S1 Effect of temperature on the ternary phase diagram of  $\text{bmimPF}_6/\text{DMF}/\text{H}_2\text{O}$  system.

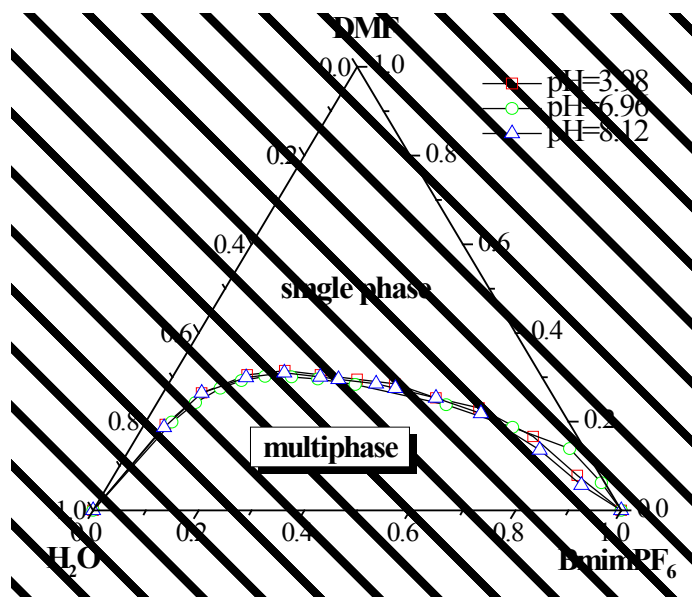

**Fig. S2** Effect of pH on the ternary phase diagram of bmimPF<sub>6</sub>/DMF/H<sub>2</sub>O system.

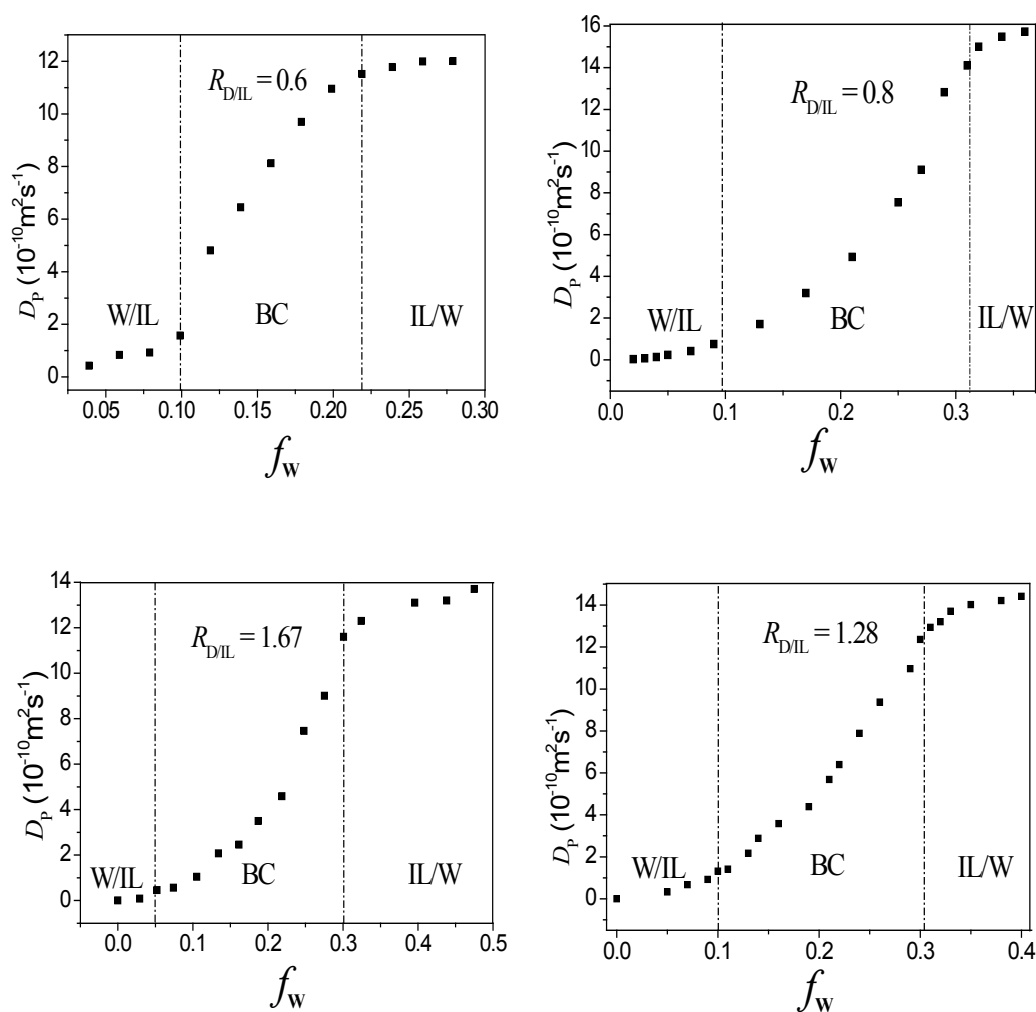

**Fig. S3** Diffusion coefficient of K<sub>4</sub>Fe(CN)<sub>6</sub> as a function of  $f_w$  at different  $R_{D/IL}$  values as stated.

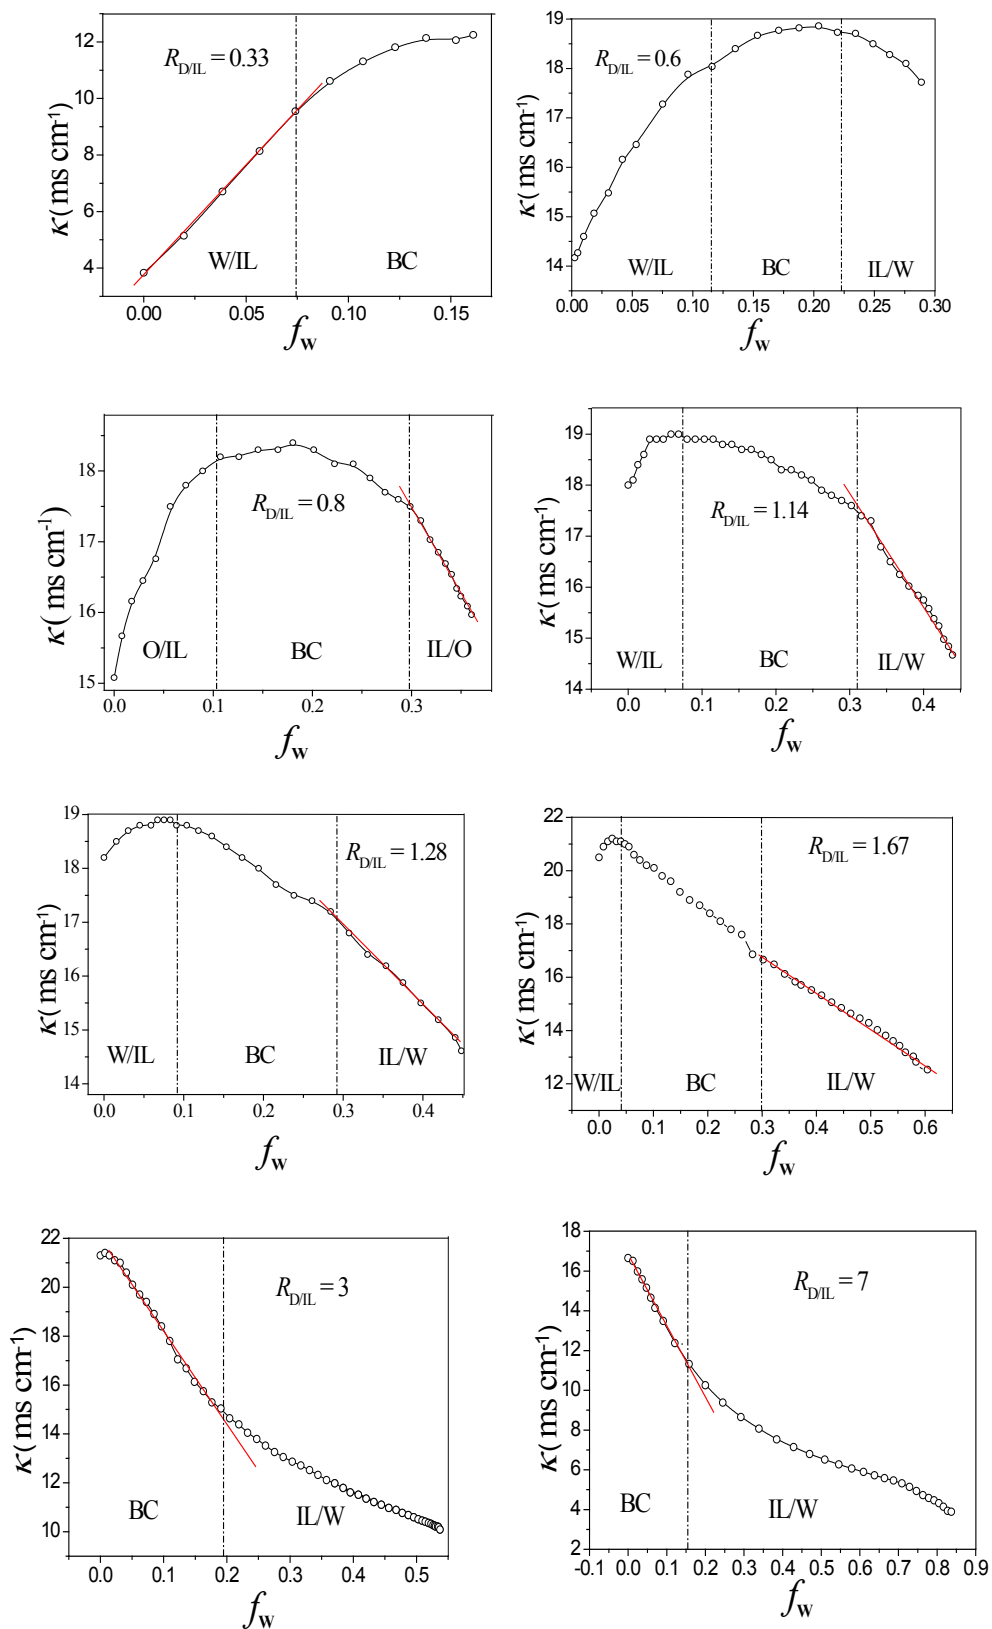

**Fig. S4** Electric conductivity of the microemulsions as a function of  $f_w$  at different  $R_{D/IL}$  values as stated.

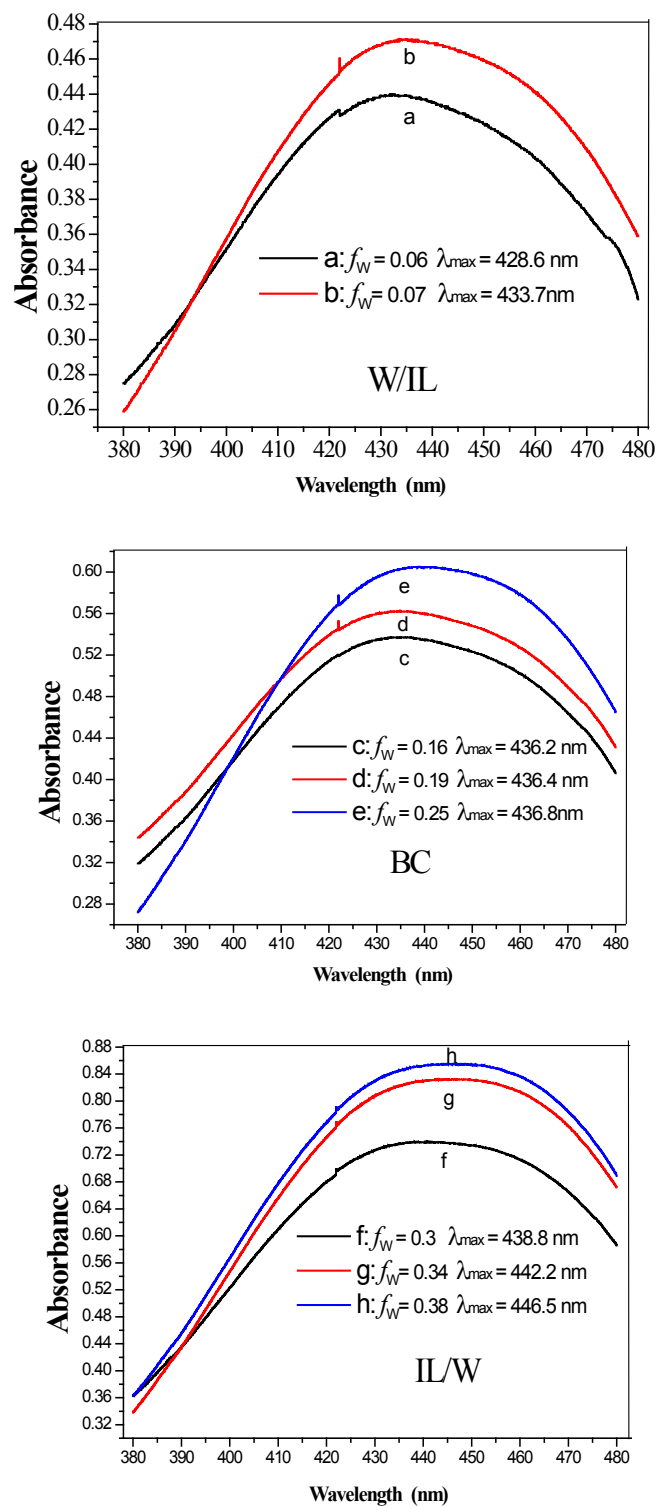

Fig. S5 The UV-vis absorption spectra of MO in bmimPF<sub>6</sub>/DMF/H<sub>2</sub>O microemulsion at  $R_{D/IL} = 1$  with different water volume fraction  $f_W$  as stated, The MO concentration is  $0.096 \text{ mmol} \cdot \text{L}^{-1}$

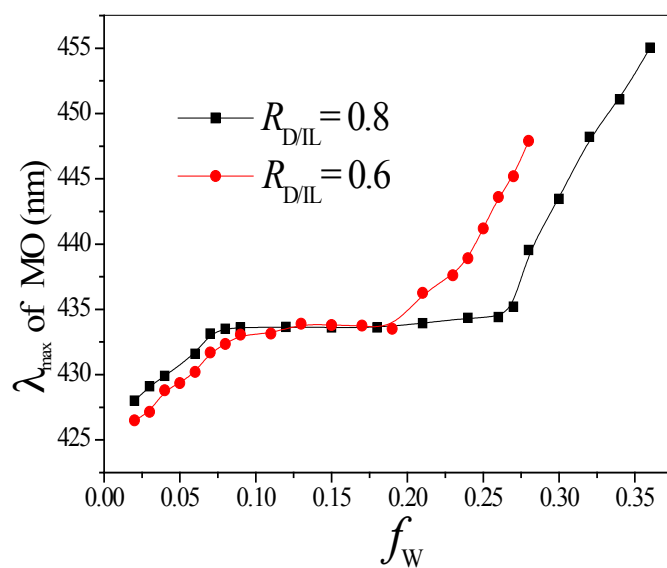

**Fig. S6**  $\lambda_{\max}$  of MO in bmimPF<sub>6</sub>/DMF/H<sub>2</sub>O microemulsion as a function of  $f_w$  at  $R_{D/IL} = 0.6$  and 0.8. The MO concentration is 0.096 mmol·L<sup>-1</sup>

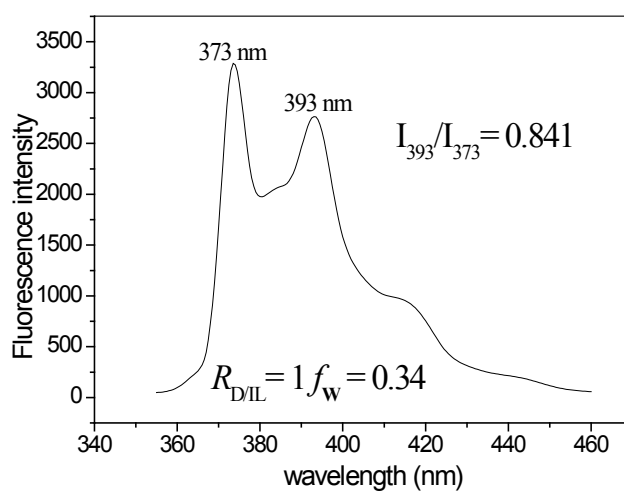

**Fig. S7** Fluorescence emission spectrum of pyrene in the microemulsion with  $R_{D/IL} = 1$  and  $f_w = 0.34$ .

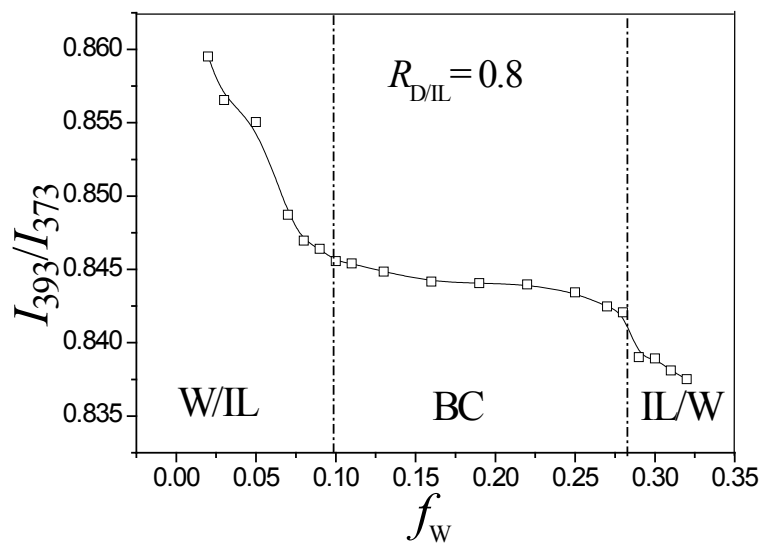

**Fig. S8** Intensity ratio  $I_{393}/I_{373}$  of pyrene in bmimPF<sub>6</sub>/DMF/H<sub>2</sub>O microemulsions with  $R_{D/IL} = 0.8$  as a function of  $f_w$ .
